# Supplementary material
Source: MDPI journal article supplement (https://www.mdpi.com/2071-1050/7/7/8223)
Supplement: s1 [file s1]

# Compilation of an Embodied CO<sub>2</sub> Emission Inventory for China Using 135-Sector Input-Output Tables. *Sustainability* 2015, 7, 8223-8239

Qian Zhang \*, Jun Nakatani and Yuichi Moriguchi

Department of Urban Engineering, The University of Tokyo, 7-3-1 Hongo, Bunkyo-ku, Tokyo 113-8656, Japan; E-Mails: nakatani@env.t.u-tokyo.ac.jp (J.N.); yuichi@env.t.u-tokyo.ac.jp (Y.M.)

\* Author to whom correspondence should be addressed; E-Mail: zhang\_qian@env.t.u-tokyo.ac.jp; Tel./Fax: +81-3-5841-1279.

**Table S1.** Explanation of data sources.

| Sources                                  | Contents                                                                                                | Characteristics                                                                                                                                                                                                           |
|------------------------------------------|---------------------------------------------------------------------------------------------------------|---------------------------------------------------------------------------------------------------------------------------------------------------------------------------------------------------------------------------|
| China Energy Statistical Yearbook [1]    | Energy balance sheets                                                                                   | Energy transformation and loss                                                                                                                                                                                            |
|                                          | The table of final energy consumption in industrial sectors                                             | 16 fuels: raw coal, cleaned coal, other washed coal, coke, coke oven gas, other gas, other coking products, crude oil, gasoline, kerosene, diesel, fuel oil, LPG, refinery gas, other petroleum products, and natural gas |
|                                          | Appendix of standard coal coefficients                                                                  | Default heat value of fuels in China                                                                                                                                                                                      |
| China Statistical Yearbook [2]           | The table of energy consumption in primary industry, construction, tertiary industry, and household use | 8 fuels: coal total, coke, crude oil, gasoline, kerosene, diesel, fuel oil, and natural gas                                                                                                                               |
|                                          | The sheet of investment in environmental treatment                                                      | Invested money in urban environmental infrastructure                                                                                                                                                                      |
| Input-Output Tables of China in 2007 [3] | Input-output tables and coefficients                                                                    | 135 sectors including 40 sectors of tertiary industry                                                                                                                                                                     |
| Guidelines for national inventories [4]  | Volume 2: Energy                                                                                        | Default carbon contents and heat value of fuels (as reference)                                                                                                                                                            |

**Table S2.** Clarification of sector names in this study [3].

| Specific IO Sector                                                                          | Code II | Code I | Corresponding General IO Sector                                                                 |
|---------------------------------------------------------------------------------------------|---------|--------|-------------------------------------------------------------------------------------------------|
| <b>Farming</b>                                                                              | 001     | 1      | Agriculture, Forestry, Animal Husbandry, and Fishery                                            |
| <b>Forestry</b>                                                                             | 002     | 1      | Agriculture, Forestry, Animal Husbandry, and Fishery                                            |
| <b>Animal Husbandry</b>                                                                     | 003     | 1      | Agriculture, Forestry, Animal Husbandry, and Fishery                                            |
| <b>Fishery</b>                                                                              | 004     | 1      | Agriculture, Forestry, Animal Husbandry, and Fishery                                            |
| <b>Services in Support of Agriculture</b>                                                   | 005     | 1      | Agriculture, Forestry, Animal Husbandry, and Fishery                                            |
| <b>Mining and Washing of Coal</b>                                                           | 006     | 2      | Mining and Washing of Coal                                                                      |
| <b>Extraction of Petroleum and Natural Gas</b>                                              | 007     | 3      | Extraction of Petroleum and Natural Gas                                                         |
| <b>Mining of Ferrous Metal Ores</b>                                                         | 008     | 4      | Mining of Metal Ores                                                                            |
| <b>Mining of Non-Ferrous Metal Ores</b>                                                     | 009     | 4      | Mining of Metal Ores                                                                            |
| <b>Mining and Processing of Nonmetal Ores and Other Ores</b>                                | 010     | 5      | Mining and Processing of Nonmetal Ores and Other Ores                                           |
| <b>Grinding of Grains</b>                                                                   | 011     | 6      | Manufacture of Foods and Tobacco                                                                |
| <b>Processing of Forage</b>                                                                 | 012     | 6      | Manufacture of Foods and Tobacco                                                                |
| <b>Refining of Vegetable Oil</b>                                                            | 013     | 6      | Manufacture of Foods and Tobacco                                                                |
| <b>Manufacture of Sugar</b>                                                                 | 014     | 6      | Manufacture of Foods and Tobacco                                                                |
| <b>Slaughtering and Processing of Meat</b>                                                  | 015     | 6      | Manufacture of Foods and Tobacco                                                                |
| <b>Processing of Aquatic Product</b>                                                        | 016     | 6      | Manufacture of Foods and Tobacco                                                                |
| <b>Processing of Other Foods</b>                                                            | 017     | 6      | Manufacture of Foods and Tobacco                                                                |
| <b>Manufacture of Convenience Food</b>                                                      | 018     | 6      | Manufacture of Foods and Tobacco                                                                |
| <b>Manufacture of Liquid Milk and Dairy Products</b>                                        | 019     | 6      | Manufacture of Foods and Tobacco                                                                |
| <b>Manufacture of Flavoring and Ferment Products</b>                                        | 020     | 6      | Manufacture of Foods and Tobacco                                                                |
| <b>Manufacture of Other Foods</b>                                                           | 021     | 6      | Manufacture of Foods and Tobacco                                                                |
| <b>Manufacture of Alcohol and Wine</b>                                                      | 022     | 6      | Manufacture of Foods and Tobacco                                                                |
| <b>Processing of Soft Drinks and Purified Tea</b>                                           | 023     | 6      | Manufacture of Foods and Tobacco                                                                |
| <b>Manufacture of Tobacco</b>                                                               | 024     | 6      | Manufacture of Foods and Tobacco                                                                |
| <b>Spinning and Weaving, Printing and Dyeing of Cotton and Chemical Fiber</b>               | 025     | 7      | Manufacture of Textiles                                                                         |
| <b>Spinning and Weaving, Dyeing and Finishing of Wool</b>                                   | 026     | 7      | Manufacture of Textiles                                                                         |
| <b>Spinning and Weaving of Hemp and Tiffany</b>                                             | 027     | 7      | Manufacture of Textiles                                                                         |
| <b>Manufacture of Textile Products</b>                                                      | 028     | 7      | Manufacture of Textiles                                                                         |
| <b>Manufacture of Knitted Fabric and Its Products</b>                                       | 029     | 7      | Manufacture of Textiles                                                                         |
| <b>Manufacture of Textile Wearing Apparel, Footwear, and Caps</b>                           | 030     | 8      | Manufacture of Textile Wearing Apparel, Footwear, Caps, Leather, Fur, Feather and Its Products  |
| <b>Manufacture of Leather, Fur, Feather and Its Products</b>                                | 031     | 8      | Manufacture of Textile Wearing Apparel, Footwear, Caps, Leather, Fur, Feather and Its Products  |
| <b>Processing of Timbers, Manufacture of Wood, Bamboo, Rattan, Palm, and Straw Products</b> | 032     | 9      | Processing of Timbers and Manufacture of Furniture                                              |
| <b>Manufacture of Furniture</b>                                                             | 033     | 9      | Processing of Timbers and Manufacture of Furniture                                              |
| <b>Manufacture of Paper and Paper Products</b>                                              | 034     | 10     | Papermaking, Printing and Manufacture of Articles for Culture, Education, and Sports Activities |
| <b>Printing, Reproduction of Recording Media</b>                                            | 035     | 10     | Papermaking, Printing and Manufacture of Articles for Culture, Education, and Sports Activities |

Table S2. *Cont.*

| Specific IO Sector                                                   | Code II | Code I | Corresponding General IO Sector                                                                 |
|----------------------------------------------------------------------|---------|--------|-------------------------------------------------------------------------------------------------|
| Manufacture of Articles for Culture, Education and Sports Activities | 036     | 10     | Papermaking, Printing and Manufacture of Articles for Culture, Education, and Sports Activities |
| Processing of Petroleum and Nuclear Fuel                             | 037     | 11     | Processing of Petroleum, Coking, Processing of Nuclear Fuel                                     |
| Coking                                                               | 038     | 11     | Processing of Petroleum, Coking, Processing of Nuclear Fuel                                     |
| Manufacture of Basic Chemical Raw Materials                          | 039     | 12     | Chemical Industry                                                                               |
| Manufacture of Fertilizers                                           | 040     | 12     | Chemical Industry                                                                               |
| Manufacture of Pesticides                                            | 041     | 12     | Chemical Industry                                                                               |
| Manufacture of Paints, Printing Inks, Pigments and Similar Products  | 042     | 12     | Chemical Industry                                                                               |
| Manufacture of Synthetic Materials                                   | 043     | 12     | Chemical Industry                                                                               |
| Manufacture of Special Chemical Products                             | 044     | 12     | Chemical Industry                                                                               |
| Manufacture of Chemical Products for Daily Use                       | 045     | 12     | Chemical Industry                                                                               |
| Manufacture of Medicines                                             | 046     | 12     | Chemical Industry                                                                               |
| Manufacture of Chemical Fiber                                        | 047     | 12     | Chemical Industry                                                                               |
| Manufacture of Rubber                                                | 048     | 12     | Chemical Industry                                                                               |
| Manufacture of Plastic                                               | 049     | 12     | Chemical Industry                                                                               |
| Manufacture of Cement, Lime, and Plaster                             | 050     | 13     | Manufacture of Non-Metallic Mineral Products                                                    |
| Manufacture of Products of Cement and Plaster                        | 051     | 13     | Manufacture of Non-Metallic Mineral Products                                                    |
| Manufacture of Brick, Stone, and Other Building Materials            | 052     | 13     | Manufacture of Non-Metallic Mineral Products                                                    |
| Manufacture of Glass and Its Products                                | 053     | 13     | Manufacture of Non-Metallic Mineral Products                                                    |
| Manufacture of Pottery and Porcelain                                 | 054     | 13     | Manufacture of Non-Metallic Mineral Products                                                    |
| Manufacture of Fire-resistant Materials                              | 055     | 13     | Manufacture of Non-Metallic Mineral Products                                                    |
| Manufacture of Graphite and Other Nonmetallic Mineral Products       | 056     | 13     | Manufacture of Non-Metallic Mineral Products                                                    |
| Iron-Smelting                                                        | 057     | 14     | Smelting and Rolling of Metals                                                                  |
| Steel making                                                         | 058     | 14     | Smelting and Rolling of Metals                                                                  |
| Rolling of Steel                                                     | 059     | 14     | Smelting and Rolling of Metals                                                                  |
| Smelting of Ferroalloy                                               | 060     | 14     | Smelting and Rolling of Metals                                                                  |
| Smelting of Non-Ferrous Metals and Manufacture of Alloys             | 061     | 14     | Smelting and Rolling of Metals                                                                  |
| Rolling of Non-Ferrous Metals                                        | 062     | 14     | Smelting and Rolling of Metals                                                                  |
| Manufacture of Metal Products                                        | 063     | 15     | Manufacture of Metal Products                                                                   |
| Manufacture of Boiler and Prime Mover                                | 064     | 16     | Manufacture of General Purpose and Special Purpose Machinery                                    |
| Manufacture of Metalworking Machinery                                | 065     | 16     | Manufacture of General Purpose and Special Purpose Machinery                                    |
| Manufacture of Lifters                                               | 066     | 16     | Manufacture of General Purpose and Special Purpose Machinery                                    |
| Manufacture of Pump, Valve and Similar Machinery                     | 067     | 16     | Manufacture of General Purpose and Special Purpose Machinery                                    |

Table S2. *Cont.*

| Specific IO Sector                                                                                  | Code II | Code I | Corresponding General IO Sector                                                          |
|-----------------------------------------------------------------------------------------------------|---------|--------|------------------------------------------------------------------------------------------|
| Manufacture of Other General Purpose Machinery                                                      | 068     | 16     | Manufacture of General Purpose and Special Purpose Machinery                             |
| Manufacture of Special Purpose Machinery for Mining, Metallurgy, and Construction                   | 069     | 16     | Manufacture of General Purpose and Special Purpose Machinery                             |
| Manufacture of Special Purpose Machinery for Chemical Industry, Processing of Timber, and Nonmetals | 070     | 16     | Manufacture of General Purpose and Special Purpose Machinery                             |
| Manufacture of Special Purpose Machinery for Agriculture, Forestry, Animal Husbandry, and Fishery   | 071     | 16     | Manufacture of General Purpose and Special Purpose Machinery                             |
| Manufacture of Other Special Purpose Machinery                                                      | 072     | 16     | Manufacture of General Purpose and Special Purpose Machinery                             |
| Manufacture of Railroad Transport Equipment                                                         | 073     | 17     | Manufacture of Transport Equipment                                                       |
| Manufacture of Automobiles                                                                          | 074     | 17     | Manufacture of Transport Equipment                                                       |
| Manufacture of Boats and Ships and Floating Devices                                                 | 075     | 17     | Manufacture of Transport Equipment                                                       |
| Manufacture of Other Transport Equipment                                                            | 076     | 17     | Manufacture of Transport Equipment                                                       |
| Manufacture of Generators                                                                           | 077     | 18     | Manufacture of Electrical Machinery and Equipment                                        |
| Manufacture of Equipment for Power Transmission and Distribution and Control                        | 078     | 18     | Manufacture of Electrical Machinery and Equipment                                        |
| Manufacture of Wire, Cable, Optical Cable, and Electrical Appliances                                | 079     | 18     | Manufacture of Electrical Machinery and Equipment                                        |
| Manufacture of Household Electric and Non-electric Appliances                                       | 080     | 18     | Manufacture of Electrical Machinery and Equipment                                        |
| Manufacture of Other Electrical Machinery and Equipment                                             | 081     | 18     | Manufacture of Electrical Machinery and Equipment                                        |
| Manufacture of Communication Equipment                                                              | 082     | 19     | Manufacture of Communication Equipment, Computers, and Other Electronic Equipment        |
| Manufacture of Radar and Broadcasting Equipment                                                     | 083     | 19     | Manufacture of Communication Equipment, Computers, and Other Electronic Equipment        |
| Manufacture of Computer                                                                             | 084     | 19     | Manufacture of Communication Equipment, Computers, and Other Electronic Equipment        |
| Manufacture of Electronic Component                                                                 | 085     | 19     | Manufacture of Communication Equipment, Computers, and Other Electronic Equipment        |
| Manufacture of Household Audiovisual Apparatus                                                      | 086     | 19     | Manufacture of Communication Equipment, Computers, and Other Electronic Equipment        |
| Manufacture of Other Electronic Equipment                                                           | 087     | 19     | Manufacture of Communication Equipment, Computers, and Other Electronic Equipment        |
| Manufacture of Measuring Instruments                                                                | 088     | 20     | Manufacture of Measuring Instruments and Machinery for Cultural Activity and Office Work |
| Manufacture of Machinery for Culture Activities and Office Work                                     | 089     | 20     | Manufacture of Measuring Instruments and Machinery for Cultural Activity and Office Work |
| Manufacture of Artwork, Other Manufacture                                                           | 090     | 21     | Manufacture of Artwork, Other Manufacture                                                |
| Scrap and Waste                                                                                     | 091     | 22     | Scrap and Waste                                                                          |

Table S2. *Cont.*

| Specific IO Sector                                         | Code II | Code I | Corresponding General IO Sector                                     |
|------------------------------------------------------------|---------|--------|---------------------------------------------------------------------|
| Production and Supply of Electric Power and Heat Power     | 092     | 23     | Production and Supply of Electric Power and Heat Power              |
| Production and Distribution of Gas                         | 093     | 24     | Production and Distribution of Gas                                  |
| Production and Distribution of Water                       | 094     | 25     | Production and Distribution of Water                                |
| Construction                                               | 095     | 26     | Construction                                                        |
| Transport via Railway                                      | 096     | 27     | Traffic, Transport, and Storage                                     |
| Transport via Road                                         | 097     | 27     | Traffic, Transport, and Storage                                     |
| Urban Public Traffic                                       | 098     | 27     | Traffic, Transport, and Storage                                     |
| Water Transport                                            | 099     | 27     | Traffic, Transport, and Storage                                     |
| Air Transport                                              | 100     | 27     | Traffic, Transport and Storage                                      |
| Transport via Pipeline                                     | 101     | 27     | Traffic, Transport, and Storage                                     |
| Loading, Unloading, Portage, and Other Transport Services  | 102     | 27     | Traffic, Transport, and Storage                                     |
| Storage                                                    | 103     | 27     | Traffic, Transport, and Storage                                     |
| Post                                                       | 104     | 28     | Post                                                                |
| Telecom & Other Information Transmission Services          | 105     | 29     | Information Transmission, Computer Services, and Software           |
| Computer Services                                          | 106     | 29     | Information Transmission, Computer Services, and Software           |
| Software Industry                                          | 107     | 29     | Information Transmission, Computer Services, and Software           |
| Wholesale and Retail Trades                                | 108     | 30     | Wholesale and Retail Trades                                         |
| Hotels                                                     | 109     | 31     | Hotels and Catering Services                                        |
| Catering Services                                          | 110     | 31     | Hotels and Catering Services                                        |
| Banking, Security, Other Financial Activities              | 111     | 32     | Financial Intermediation                                            |
| Insurance                                                  | 112     | 32     | Financial Intermediation                                            |
| Real Estate                                                | 113     | 33     | Real Estate                                                         |
| Leasing                                                    | 114     | 34     | Leasing and Business Services                                       |
| Business Services                                          | 115     | 34     | Leasing and Business Services                                       |
| Tourism                                                    | 116     | 34     | Leasing and Business Services                                       |
| Research and Experimental Development                      | 117     | 35     | Research and Experimental development                               |
| Professional Technical Services                            | 118     | 36     | Comprehensive Technical Services                                    |
| Services of Science and Technology Exchanges and Promotion | 119     | 36     | Comprehensive Technical Services                                    |
| Geological Prospecting                                     | 120     | 36     | Comprehensive Technical Services                                    |
| Management of Water Conservancy                            | 121     | 37     | Management of Water Conservancy, Environment, and Public Facilities |
| Environment Management                                     | 122     | 37     | Management of Water Conservancy, Environment, and Public Facilities |
| Management of Public Facilities                            | 123     | 37     | Management of Water Conservancy, Environment, and Public Facilities |
| Services to Households                                     | 124     | 38     | Services to Household and Other Services                            |
| Other Services                                             | 125     | 38     | Services to Household and Other Services                            |

**Table S2. Cont.**

| Specific IO Sector                                                       | Code II | Code I | Corresponding General IO Sector             |
|--------------------------------------------------------------------------|---------|--------|---------------------------------------------|
| <b>Education</b>                                                         | 126     | 39     | Education                                   |
| <b>Health</b>                                                            | 127     | 40     | Health, Social Security, and Social Welfare |
| <b>Social Security</b>                                                   | 128     | 40     | Health, Social Security, and Social Welfare |
| <b>Social Welfare</b>                                                    | 129     | 40     | Health, Social Security, and Social Welfare |
| <b>Journalism and Publishing Activities</b>                              | 130     | 41     | Culture, Sports, and Entertainment          |
| <b>Broadcasting, Movies, Televisions,<br/>and Audiovisual Activities</b> | 131     | 41     | Culture, Sports, and Entertainment          |
| <b>Cultural and Art Activities</b>                                       | 132     | 41     | Culture, Sports, and Entertainment          |
| <b>Sports Activities</b>                                                 | 133     | 41     | Culture, Sports, and Entertainment          |
| <b>Entertainment</b>                                                     | 134     | 41     | Culture, Sports, and Entertainment          |
| <b>Public Management and Social Organization</b>                         | 135     | 42     | Public Management and Social Organization   |

## References

1. NBS. *Chinese Energy Statistics Yearbook-2007*; China Statistics Press: Beijing, China, 2008.
2. NBS. China Statistical Yearbook 2008. Available online: <http://www.stats.gov.cn/tjsj/ndsj/2008/indexeh.htm> (accessed on 13 April 2015).
3. NBS. *2007 Input-Output Tables of China*; China Statistics Press: Beijing, China, 2009.
4. IPCC. *2006 IPCC Guidelines for National Greenhouse Gas Inventories*; Eggleston, H.S., Buendia, L., Miwa, K., Ngara, T., Tanabe, K., Eds.; Institute for Global Environmental Strategies (IGES): Tokyo, Japan, 2006.

© 2015 by the authors; licensee MDPI, Basel, Switzerland. This article is an open access article distributed under the terms and conditions of the Creative Commons Attribution license (<http://creativecommons.org/licenses/by/4.0/>).
